# Supplementary material for: AI-based molecular classification of diffuse gliomas using rapid, label-free optical imaging
Source: Research Square preprint supplement (doi:10.21203/rs.3.rs-1930236/v1), 2022-08-10
Supplement: Supplementary file 1 [file 3ff801af9e78b3c22ca89439.xlsx]

## Sheet: training_final
patient_ID	center	pathology	class	who_grade	idh1	idh2	idh	codel	atrx
1	UM	Anaplastic astrocytoma	astrocytoma	3	1	0	1	0	1
2	UM	Diffuse astrocytoma	astrocytoma	2	1	0	1	0	1
3	UM	Oligodendroglioma	astrocytoma	2	1	0	1	0	1
4	UM	Recurrent/residual glioblastoma	glioblastoma	4	0	0	0	0	0
5	UM	Glioblastoma, WHO IV	glioblastoma	4	0	0	0	0	0
6	UM	Infiltrating glioma, favor astrocytoma	astrocytoma	2	1	0	1	0	1
7	UM	Glioblastoma, WHO IV	glioblastoma	4	0	0	0	0	0
8	UM	Anaplastic Astrocytoma, WHO grade III	astrocytoma	3	1	0	1	0	0
9	UM	Glioblastoma, WHO IV	glioblastoma	4	0	0	0	0	0
10	UM	Gliosarcoma, WHO IV	glioblastoma	4	0	0	0	0	0
11	UM	Glioblastoma, WHO IV	glioblastoma	4	0	0	0	0	0
12	UM	Glioblastoma, WHO IV	glioblastoma	4	0	0	0	0	0
13	UM	Glioblastoma, WHO IV	glioblastoma	4	0	0	0	0	0
14	UM	Glioblastoma, WHO grade IV	glioblastoma	4	0	0	0	0	0
15	UM	Glioblastoma, WHO grade IV	glioblastoma	4	0	0	0	0	0
16	UM	Anaplastic Oligodendroglioma	oligodendroglioma	3	1	0	1	1	0
17	UM	Glioblastoma, WHO grade IV	glioblastoma	4	0	0	0	0	0
18	UM	Glioblastoma, WHO grade IV	astrocytoma	3	0	0	0	0	0
19	UM	Oligodendroglioma, WHO grade 2	oligodendroglioma	2	1	0	1	1	0
20	UM	Glioblastoma, WHO grade IV	glioblastoma	4	0	0	0	0	0
21	UM	Diffuse astrocytoma, WHO grade II	astrocytoma	2	1	0	1	0	1
22	UM	Recurrent astrocytoma, at least WHO grade III	astrocytoma	3	1	0	1	0	0
23	UM	Glioblastoma, WHO grade IV	glioblastoma	4	0	0	0	0	0
24	UM	Glioblastoma, WHO grade IV	glioblastoma	4	0	0	0	0	0
25	UM	Recurrent/residual anaplastic oligodendroglioma, WHO grade III	oligodendroglioma	3	1	0	1	1	0
26	UM	Recurrent/residual anaplastic oligodendroglioma, WHO grade III	oligodendroglioma	3	1	0	1	1	0
27	UM	Glioblastoma, WHO grade IV	glioblastoma	4	0	0	0	0	0
28	UM	Low grade astrocytoma	astrocytoma	2	0	0	0	0	0
29	UM	Diffuse astrocytoma	astrocytoma	2	1	0	1	0	1
30	UM	Glioblastoma, WHO grade IV	glioblastoma	4	0	0	0	0	0
31	UM	Glioblastoma, WHO grade IV	glioblastoma	4	0	0	0	0	0
32	UM	Diffuse astrocytoma, WHO grade II	astrocytoma	2	1	0	1	0	1
33	UM	Glioblastoma, WHO grade IV	glioblastoma	4	0	0	0	0	0
34	UM	Recurrent/residual glioblastoma. WHO grade IV	glioblastoma	4	0	0	0	0	0
35	UM	Recurrent/residual glioblastoma. WHO grade IV	glioblastoma	4	0	0	0	0	0
36	UM	Recurrent anaplastic oligodendroglioma, WHO III	oligodendroglioma	3	0	1	1	1	0
37	UM	Glioblastoma, WHO grade IV	glioblastoma	4	0	0	0	0	0
38	UM	Glioblastoma, WHO grade IV.	glioblastoma	4	1	0	1	0	1
39	UM	Anaplastic Astrocytoma, WHO grade III	glioblastoma	3	0	0	0	0	0
40	UM	Glioblastoma, WHO grade IV	glioblastoma	4	0	0	0	0	0
41	UM	Recurrent/residual anaplastic astrocytoma, WHO grade III	astrocytoma	3	1	0	1	0	1
42	UM	Glioblastoma, WHO grade IV.	glioblastoma	4	0	0	0	0	0
43	UM	Recurrent glioblastoma, WHO grade IV.	glioblastoma	4	0	0	0	0	0
44	UM	Anaplastic oligodendroglioma, WHO grade III	oligodendroglioma	3	0	1	1	1	0
45	UM	Recurrent glioblastoma, WHO grade IV	glioblastoma	4	1	0	1	0	1
46	UM	Glioblastoma, WHO grade IV	glioblastoma	4	0	0	0	0	0
47	UM	Recurrent anaplastic oligodendroglioma, WHO III	oligodendroglioma	3	1	0	1	1	0
48	UM	Glioblastoma, WHO grade IV	glioblastoma	4	0	0	0	0	0
49	UM	Glioblastoma, WHO grade IV	glioblastoma	4	0	0	0	0	0
50	UM	Glioblastoma, WHO grade IV	glioblastoma	4	0	0	0	0	0
51	UM	Oligodendroglioma, WHO grade II	oligodendroglioma	2	1	0	1	1	0
52	UM	Recurrent/residual Glioblastoma, WHO grade IV	glioblastoma	4	0	0	0	0	0
53	UM	Anaplastic astrocytoma, WHO grade III	astrocytoma	3	0	0	0	0	0
54	UM	Glioblastoma, WHO grade IV	glioblastoma	4	0	0	0	0	0
55	UM	Glioblastoma, WHO grade IV	glioblastoma	4	0	0	0	0	0
56	UM	Glioblastoma, WHO grade IV	glioblastoma	4	1	0	1	0	1
57	UM	Recurrent glioblastoma, WHO grade 4	glioblastoma	4	0	0	0	0	0
58	UM	Glioblastoma, WHO grade IV	glioblastoma	4	0	0	0	0	0
59	UM	Glioblastoma, WHO grade IV	glioblastoma	4	0	0	0	0	0
60	UM	Oligodendroglioma, WHO grade II	oligodendroglioma	2	1	0	1	1	0
61	UM	Glioblastoma, WHO grade IV	glioblastoma	4	0	0	0	0	0
62	UM	recurrent/residual glioblastoma with focal treatment effect	glioblastoma	4	0	0	0	0	0
63	UM	Glioblastoma, WHO grade IV	glioblastoma	4	0	0	0	0	0
64	UM	Glioblastoma, WHO grade IV	glioblastoma	4	0	0	0	0	0
65	UM	Recurrent/Residual anaplastic oligodendroglioma	oligodendroglioma	3	1	0	1	1	0
66	UM	Glioblastoma, WHO grade IV	glioblastoma	4	0	0	0	0	0
67	UM	Glioblastoma, WHO grade IV	glioblastoma	4	0	0	0	0	0
68	UM	Diffuse astrocytoma, WHO grade II	astrocytoma	2	1	0	1	0	1
69	UM	Glioblastoma, WHO grade IV	glioblastoma	4	0	0	0	0	0
70	UM	Glioblastoma, WHO grade IV	glioblastoma	4	0	0	0	0	0
71	UM	Residual infiltrating astrocytoma, WHO grade II	astrocytoma	2	1	0	1	0	1
72	UM	recurrent/residual high grade glioma	astrocytoma	2	1	0	1	0	0
73	UM	Glioblastoma, WHO grade IV	glioblastoma	4	0	0	0	0	0
74	UM	RECURRENT/RESIDUAL OLIGODENDROGLIOMA , WHO grade III	oligodendroglioma	3	1	0	1	1	0
75	UM	Recurrent/ residual glioblastoma	glioblastoma	4	0	0	0	0	0
76	UM	Recurrent glioblastoma, WHO IV	glioblastoma	4	1	0	1	0	1
77	UM	Oligodendroglioma, WHO grade II	oligodendroglioma	2	1		1	1	0
78	UM	Recurrent/ residual anaplastic astrocytoma, WHO grade III	astrocytoma	3	0	0	0	0	0
79	UM	Glioblastoma, WHO grade IV	glioblastoma	4	0	0	0	0	0
80	UM	Glioblastoma, WHO grade IV	glioblastoma	4	0	0	0	0	0
81	UM	Glioblastoma, WHO grade IV (IDHmut)	glioblastoma	4	1	0	1	0	0
82	UM	Glioblastoma, WHO grade IV	glioblastoma	4	0	0	0	0	0
83	UM	Diffuse astrocytoma, WHO grade II	astrocytoma	2	1	0	1	0	1
84	UM	Oligodendroglioma, WHO grade II	oligodendroglioma	2	0	0	1	1	0
85	UM	recurrent/residual oligodendroglioma	oligodendroglioma	2	1	0	1	1	0
86	UM	Glioblastoma, WHO grade IV	glioblastoma	4	0	0	0	0	0
87	UM	Glioblastoma, WHO grade IV	glioblastoma	4	0	0	0	0	0
88	UM	Glioblastoma, WHO grade IV	glioblastoma	4	0	0	0	0	0
89	UM	Glioblastoma, WHO grade IV	glioblastoma	4	0	0	0	0	0
90	UM	giant cell glioblastoma	glioblastoma	4	0	0	0	0	0
91	UM	glioblastoma, secondary	glioblastoma	4	1	0	1	0	0
92	UM	Residual/reccurrent anaplastic astrocytoma, WHO grade III	astrocytoma	3	0	0	0	0	0
93	UM	Glioblastoma, WHO grade IV (IDH mutant)	glioblastoma	4	1	0	1	0	1
94	UM	Oligodendroglioma, WHO grade II	oligodendroglioma	2	1	0	1	1	0
95	UM	Glioblastoma, WHO grade IV (IDH mutant)	glioblastoma	4	1	0	1	0	1
96	UM	recurrent/residual anaplastic oligodendroglioma	oligodendroglioma	3	1	0	1	1	0
97	UM	Glioblastoma, WHO grade IV	glioblastoma	4	0	0	0	0	0
98	UM	Anaplastic Astrocytoma, WHO grade III	astrocytoma	3	1	0	1	0	1
99	UM	Glioblastoma, WHO grade IV	glioblastoma	4	0	0	0	0	0
100	UM	recurrent/residual oligodendroglioma	oligodendroglioma	3	1	0	1	1	0
101	UM	Diffuse astrocytoma, WHO grade II	astrocytoma	2	0	0	0	0	0
102	UM	Glioblastoma, WHO grade IV	glioblastoma	4	0	0	0	0	0
103	UM	Glioblastoma, WHO grade IV	glioblastoma	4	0	0	0	0	0
104	UM	Glioblastoma, WHO grade IV	glioblastoma	4	0	0	0	0	0
105	UM	Glioblastoma, WHO grade IV	glioblastoma	4	0	0	0	0	0
106	UM	Glioblastoma, WHO grade IV	glioblastoma	4	0	0	0	0	0
107	UM	Glioblastoma, WHO grade IV	glioblastoma	4	0	0	0	0	0
108	UM	Glioblastoma, WHO grade IV	glioblastoma	4	0	0	0	0	0
109	UM	Glioblastoma, WHO grade IV	glioblastoma	4	0	0	0	0	0
110	UM	Glioblastoma, WHO grade IV	glioblastoma	4	0	0	0	0	0
111	UM	Glioblastoma, WHO grade IV	glioblastoma	4	0	0	0	0	0
112	UM	Glioblastoma, WHO grade IV	glioblastoma	4	0	0	0	0	0
113	UM	Glioblastoma, WHO grade IV	glioblastoma	4	0	0	0	0	0
114	UM	Glioblastoma, WHO grade IV	glioblastoma	4	0	0	0	0	0
115	UM	Glioblastoma, WHO grade IV	glioblastoma	4	0	0	0	0	0
116	UM	Diffuse astrocytoma, WHO grade II	astrocytoma	2	1	0	1	0	1
117	UM	Diffuse astrocytoma, WHO grade II	astrocytoma	2	1	0	1	0	1
118	UM	Glioblastoma, WHO grade IV	glioblastoma	4	0	0	0	0	0
119	UM	Glioblastoma, WHO grade IV	glioblastoma	4	0	0	0	0	0
120	UM	Anaplastic oligodendrogioma, WHO grade III	oligodendroglioma	3	1	0	1	1	0
121	UM	Anaplastic oligodendrogioma, WHO grade III	oligodendroglioma	3	1	0	1	1	0
122	UM	Glioblastoma, WHO grade IV	glioblastoma	4	0	0	0	0	0
123	UM	Glioblastoma, WHO grade IV	glioblastoma	4	1	0	1	0	0
124	UM	Glioblastoma, WHO grade IV	glioblastoma	4	0	0	0	0	0
125	UM	Glioblastoma, WHO grade IV	glioblastoma	4	0	0	0	0	0
126	UM	Anaplastic Astrocytoma, WHO grade III	astrocytoma	3	1	0	1	0	1
127	UM	Glioblastoma, WHO grade IV	glioblastoma	4	0	0	0	0	0
128	UM	Glioblastoma, WHO grade IV	glioblastoma	4	0	0	0	0	0
129	UM	Glioblastoma, WHO grade IV	glioblastoma	4	0	0	0	0	0
130	UM	oligodendroglioma	oligodendroglioma	2	1	0	1	1	0
131	UM	Glioblastoma, WHO grade IV	glioblastoma	4	0	0	0	0	0
132	UM	Glioblastoma, WHO grade IV	glioblastoma	4	0	0	0	0	0
133	UM	Glioblastoma, WHO grade IV	glioblastoma	4	0	0	0	0	0
134	UM	Anaplastic astrocytoma, WHIO grade III	astrocytoma	3	1	0	1	0	1
135	UM	Glioblastoma, WHO grade IV	glioblastoma	4	0	0	0	0	0
136	UM	Anaplastic astrocytoma, WHIO grade III	astrocytoma	3	1	0	1	0	1
137	UM	Glioblastoma, WHO grade IV	glioblastoma	4	0	0	0	0	0
138	UM	Glioblastoma, WHO grade IV	glioblastoma	4	0	0	0	0	0
139	UM	Glioblastoma, WHO grade IV	glioblastoma	4	0	0	0	0	0
140	UM	Glioblastoma, WHO grade IV	glioblastoma	4	0	0	0	0	0
141	UM	Glioblastoma, IDH wild type, MGMT+, WHO grade 4	glioblastoma	4	0	0	0	0	1
142	UM	Oligodendroglioma, WHO grade II	oligodendroglioma	2	1	0	1	1	0
143	UM	Oligodendroglioma, WHO grade II	oligodendroglioma	2	1	0	1	1	0
144	UM	GLIOBLASTOMA, IDH-wildtype (R132H), WHO grade IV	glioblastoma	4	0	0	0	0	0
145	UM	Glioblastoma, WHO grade IV	glioblastoma	4	0	0	0	0	0
146	UM	anaplastic oligodendroglioma	oligodendroglioma	3	1	0	1	1	0
147	UM	Glioblastoma, WHO grade IV	glioblastoma	4	0	0	0	0	0
148	UM	Glioblastoma, WHO grade IV	glioblastoma	4	0	0	0	0	0
149	UM	oligodendroglioma	oligodendroglioma	2	1	0	1	1	0
150	UM	Glioblastoma, WHO grade IV	glioblastoma	4	0	0	0	0	0
151	UM	Glioblastoma, WHO grade IV	glioblastoma	4	0	0	0	0	0
152	UM	Diffuse Astrocytoma, WHO grade II	astrocytoma	2	1	0	1	0	1
153	UM	Glioblastoma, WHO grade IV	glioblastoma	2	0	0	0	0	0
154	UM	OLIGODENDROGLIOMA, IDH-MUTANT, WHO GRADE II	oligodendroglioma	2	1	0	1	1	0
155	UM	anaplastic oligodendroglioma	oligodendroglioma	3	1	0	1	1	0
156	UM	Oligodendroglioma, WHO grade II	oligodendroglioma	2	1	0	1	1	0
157	UM	Diffuse astrocytoma, WHO II	astrocytoma	2	1	0	1	0	1
158	UM	Glioblastoma, WHO grade IV	glioblastoma	4	0	0	0	0	0
159	UM	diffuse astrocytoma	astrocytoma	2	1	0	1	0	1
160	UM	oligodendroglioma	oligodendroglioma	2	1	0	1	1	0
161	UM	Glioblastoma, WHO grade IV	glioblastoma	4	0	0	0	0	0
162	UM	anaplastic oligodendroglioma	oligodendroglioma	3	1	0	1	1	0
163	UM	Glioblastoma, WHO grade IV	glioblastoma	4	0	0	0	0	0
164	UM	Glioblastoma, WHO grade IV	glioblastoma	4	0	0	0	0	0
165	UM	High-grade Astrocytoma, Epithelioid Glioblastoma vs. Anaplastic Pleomorphic Xanthoastrocytoma	astrocytoma	3	0	0	0	0	0
166	UM	Recurrent/residual astrocytoma, IDH-mutant, at least WHO grade 2.	astrocytoma	2	1	0	1	0	1
167	UM	Glioblastoma, WHO grade IV	glioblastoma	4	0	0	0	0	0
168	UM	Glioblastoma, IDH1 R132H negative, WHO grade 4	glioblastoma	4	0	0	0	0	0
169	UM	Glioblastoma, IDH1 R132H negative, WHO grade 4	glioblastoma	4	0	0	0	0	0
170	UM	Glioblastoma, IDH1 R132H negative, WHO grade 4	glioblastoma	4	0	0	0	0	0
171	UM	Molecular features of Glioblastoma, IDH wild type, WHO Grade 4	glioblastoma	4	0	0	0	0	0
172	UM	Glioblastoma, WHO grade IV	glioblastoma	4	0	0	0	0	0
173	UM	Glioblastoma, IDH wild type, WHO Grade 4	glioblastoma	4	0	0	0	0	0
174	UM	Oligodendroglioma, IDH-mutant and 1p/19q-codeleted, WHO grade 2 .	oligodendroglioma	2	0	0	1	1	0
175	UM	Glioblastoma, IDH-wildtype, WHO grade 4	glioblastoma	4	0	0	0	0	0
176	UM	Astrocytoma, IDH-mutant, WHO grade 4, clinically residual/recurrent	astrocytoma	4	1	0	1	0	0
177	UM	High-grade glioma, IDH1 R32H-negative, at least WHO grade 3	astrocytoma	3	0	0	0	0	0
178	UM	Glioblastoma, WHO grade IV	glioblastoma	4	0	0	0	0	0
179	UM	glioblastoma	glioblastoma	4	0	0	0	0	0
180	UM	Glioblastoma, IDH-wildtype, WHO grade 4	glioblastoma	4	0	0	0	0	0
181	UM	Glioblastoma, IDH1 R132H negative, WHO grade IV.	glioblastoma	4	0	0	0	0	0
182	UM	GLIOBLASTOMA, IDH1 (R132H)-NEGATIVE, WHO GRADE 4	glioblastoma	4	0	0	0	0	0
183	UM	Residual/recurrent Glioblastoma with sarcomatous features, WHO Grade IV	glioblastoma	4	0	0	0	0	0
184	UM	ASTROCYTOMA, IDH-MUTANT, WHO GRADE 3	astrocytoma	3	1	0	1	0	1
185	UM	Astrocytoma, IDH-mutant, WHO grade 4.	glioblastoma	4	1	0	1	0	1
186	UM	Oligodendroglioma, IDH-mutant and 1p/19q-codeleted, WHO grade 2, clinically residual/recurrent	oligodendroglioma	2	1	0	1	1	0
187	UM	Residual/recurrent Glioblastoma WHO Grade 4	glioblastoma	4	0	0	0	0	0
188	UM	Oligodendroglioma, IDH-mutant and 1p/19q-codeleted, WHO grade 3, clinically residual/recurrent	oligodendroglioma	3	1	0	1	1	0
189	UM	Glioblastoma, IDH1 R132H-negative, WHO grade 4.	glioblastoma	4	0	0	0	0	0
190	UM	Astrocytoma, IDH-mutant	astrocytoma	2	1	0	1	0	1
191	UM	Astrocytoma, IDH-mutant, WHO grade 3.	astrocytoma	3	1	0	1	0	0
192	UM	Glioblastoma, IDH-wildtype, WHO grade 4	glioblastoma	4	0	0	0	0	0
193	UM	OLIGODENDROGLIOMA, WHO GRADE 3	oligodendroglioma	3	1	0	1	1	0
194	UM	glioblastoma	glioblastoma	4	0	0	0	0	0
195	UM	high grade astrocytoma	astrocytoma	3	0	0	0	0	0
196	UM	granular cell glioblastoma	glioblastoma	4	0	0	0	0	0
197	UM	glioblastoma	glioblastoma	4	0	0	0	0	0
198	UM	glioblastoma	glioblastoma	4	0	0	0	0	0
199	UM	glioblastoma	glioblastoma	4	0	0	0	0	0
200	UM	anaplastic oligodendroglioma	oligodendroglioma	3	1	0	1	1	0
201	UM	high-grade glioma	glioblastoma	4	0	0	0	0	0
202	UM	glioblastoma	glioblastoma	4	0	0	0	0	0
203	UM	glioblastoma	glioblastoma	4	0	0	0	0	0
204	UM	glioblastoma	glioblastoma	4	0	0	0	0	0
205	UM	high grade glioma	glioblastoma	4	0	0	0	0	0
206	UM	oligodendrogioma	oligodendroglioma	2	1	0	1	1	0
207	UM	glioblastoma	glioblastoma	4	0	0	0	0	0
208	UM	glioblastoma	glioblastoma	4	0	0	0	0	0
209	UM	glioblastoma	glioblastoma	4	0	0	0	0	0
210	UM	glioblastoma	glioblastoma	4	0	0	0	0	0
211	UM	oligodendroglioma	oligodendroglioma	2	1	0	1	1	0
212	UM	glioblastoma	glioblastoma	4	0	0	0	0	0
213	UM	anaplastic oligodendroglioma	oligodendroglioma	3	1	0	1	1	0
214	UM	glioblastoma	glioblastoma	4	0	0	0	0	0
215	UM	glioblastoma	glioblastoma	4	0	0	0	0	0
216	UM	glioblastoma	glioblastoma	4	0	0	0	0	0
217	UM	glioblastoma	glioblastoma	4	0	0	0	0	0
218	UM	glioblastoma	glioblastoma	4	0	0	0	0	0
219	UM	glioblastoma	glioblastoma	4	0	0	0	0	0
220	UM	diffuse astrocytoma	glioblastoma	4	1	0	1	0	1
221	UM	recurrent glioblastoma	glioblastoma	4	0	0	0	0	0
222	UM	diffuse astrocytoma	astrocytoma	2	1	0	1	0	1
223	UM	Glioblastoma	glioblastoma	4	0	0	0	0	0
224	UM	recurrent glioblastoma	glioblastoma	4	0	0	0	0	0
225	UM	glioblastoma	glioblastoma	4	0	0	0	0	0
226	UM	diffuse astrocytoma	astrocytoma	2	1	0	1	0	1
227	UM	glioblastoma	glioblastoma	4	0	0	0	0	0
228	UM	glioblastoma	glioblastoma	4	0	0	0	0	0
229	UM	high grade astrocytoma	astrocytoma	3	1	0	1	0	1
230	UM	diffuse astrocytoma	astrocytoma	3	1	0	1	0	0
231	UM	residual oligodendroglioma	oligodendroglioma	2	1	0	1	1	0
232	UM	diffuse astrocytoma	astrocytoma	2	0	1	1	0	1
233	UM	glioblastoma, IDH1 R132H negative	glioblastoma	4	0	0	0	0	0
234	UM	glioblastoma, IDH1 R132H negative	glioblastoma	4	0	0	0	0	0
235	UM	glioblastoma, IDH1 R132H negative	glioblastoma	4	0	0	0	0	0
236	UM	glioblastoma, IDH1 R132H negative	glioblastoma	4	0	0	0	0	0
237	UM	residual infiltrating glioma, most consistant with anaplastic astroyctoma	astrocytoma	3	1	0	1	0	0
238	UM	recurrent/residual glioblastoma with sarcomatuous features, macrophages and necrosis, consistant with treatment effect	glioblastoma	4	0	0	0	0	0
239	UM	glioblastoma, IDH1 R132H negative	glioblastoma	4	0	0	0	0	0
240	UM	glioblastoma	glioblastoma	4	0	0	0	0	0
241	UM	glioblastoma, IDH-wildtype, WHO grade 4 , MGMT negative	glioblastoma	4	0	0	0	0	0
242	UM	oligodendroglioma	oligodendroglioma	2	1	0	1	1	0
243	UM	glioblastoma, IDH1 RI132H neg	glioblastoma	4	0	0	0	0	0
244	UM	glioblastoma	glioblastoma	4	0	0	0	0	0
245	UM	glioblastoma	glioblastoma	4	0	0	0	0	0
246	UM	glioblastoma	glioblastoma	4	0	0	0	0	0
247	UM	glioblastoma, IDH1 negative	glioblastoma	4	0	0	0	0	0
248	UM	recurrent/residual gliobalstoma with sarcomatous changes	glioblastoma	4	0	0	0	0	0
249	UM	anaplastic astrocytoma	astrocytoma	3	1	0	1	0	0
250	UM	diffuse astroyctoma	astrocytoma	2	1	0	1	0	1
251	UM	recurrent/residual glioblastoma	glioblastoma	4	0	0	0	0	0
252	UM	recurrent/residual oligodendroglioma, IDH1 mutant	oligodendroglioma	2	1	0	1	0	0
253	UM	glioblastoma	glioblastoma	4	0	0	0	0	0
254	UM	glioblastoma	glioblastoma	4	1	0	1	0	0
255	UM	glioblastoma	glioblastoma	4	0	0	0	0	0
256	UM	glioblastoma	glioblastoma	4	0	0	0	0	0
257	UM	anaplastic oligodendroglioma	oligodendroglioma	3	1	0	1	1	0
258	UM	diffuse infiltrating glioma	astrocytoma	2	1	0	1	0	1
259	UM	glioblastoma	glioblastoma	4	0	0	0	0	0
260	UM	high grade infiltrating glioma	astrocytoma	3	0	0	0	0	0
261	UM	recurrent/residual oligodendroglioma, WHO grade II with high proliferation index	oligodendroglioma	2	1	0	1	1	0
262	UM	Glioblastoma	glioblastoma	4	0	0	0	0	0
263	UM	recurrent/residual glioblastoma with treatment effect.	glioblastoma	4	0	0	0	0	0
264	UM	High grade glioma	glioblastoma	4	1	0	1	0	0
265	UM	glioblastoma	glioblastoma	4	0	0	0	0	0
266	UM	diffuse astrocytoma	astrocytoma	2	1	0	1	0	0
267	UM	glioblastoma	glioblastoma	4	0	0	0	0	0
268	UM	residual/recurrent high-grade glioma	glioblastoma	4	0	0	0	0	0
269	UM	recurrent/residual glioblastoma	glioblastoma	4	0	0	0	0	0
270	UM	Recurrent / residual astrocytoma, IDH-mutant	astrocytoma	2	1	0	1	0	1
271	UM	Glioblastoma, IDH-mutant, WHO Grade IV	glioblastoma	4	1	0	1	0	1
272	UM	Glioblastoma, IDH wild type, WHO grade IV	glioblastoma	4	0	0	0	0	0
273	UM	temporal lobe lesion meningioma vs. schawannoma vs met vs GBM/ glioblastoma	glioblastoma	4	0	0	0	0	0
274	UM	Glioblastoma; IDH1/2-Wildtype; WHO Grade IV	glioblastoma	4	0	0	0	0	0
275	UM	Glioblastoma; IDH1/2-Wildtype; WHO Grade IV	glioblastoma	4	0	0	0	0	0
276	UM	anaplastic oligodendroglioma	oligodendroglioma	3	1	0	1	1	0
277	UM	Glioblastoma, IDH-mutant, WHO Grade IV	glioblastoma	4	0	0	0	0	0
278	UM	Glioblastoma; IDH1/2-Wildtype; WHO Grade IV	glioblastoma	4	0	0	0	0	0
279	UM	Glioblastoma; IDH1/2-Wildtype; WHO Grade IV	glioblastoma	4	0	0	0	0	0
280	UM	recurrent/residual glioma, morphologically similar to high grade diffuse glioma. MYB altered. See michart	glioblastoma	4	0	0	0	0	1
281	UM	anaplastic astrocytoma	astrocytoma	3	1	0	1	0	1
282	UM	oligodendroglioma	oligodendroglioma	2	1	0	1	1	0
283	UM	glioblastoma	glioblastoma	4	0	0	0	0	0
284	UM	glioblastoma	glioblastoma	4	0	0	0	0	0
285	UM	anaplastic gemistocytic astryocytoma	astrocytoma	3	1	0	1	0	1
286	UM	redisdual anaplastic astrocytoma	astrocytoma	3	1	0	1	0	1
287	UM	recurrent/residual glioblastoma	glioblastoma	4	0	0	0	0	0
288	UM	diffuse astrocytic glioma	astrocytoma	3	0	0	0	0	0
289	UM	oligodendroglioma	oligodendroglioma	2	1	0	1	1	0
290	UM	Glioblastoma	glioblastoma	4	0	0	0	0	1
291	UM	anaplastic astrocytoma	astrocytoma	3	1	0	1	0	1
292	UM	Glioblastoma	glioblastoma	4	0	0	0	0	0
293	UM	Glioblastoma	glioblastoma	4	0	0	0	0	0
294	UM	Glioblastoma	glioblastoma	4	0	0	0	0	0
295	UM	Glioblastoma, IDH-wildtype and H3 G34R-mutant, WHO grade IV	glioblastoma	4	0	0	0	0	1
296	UM	Glioblastoma, IDH mutant	glioblastoma	4	1	0	1	0	1
297	UM	Recurrent/residual anaplastic oligodendroglioma	oligodendroglioma	3	1	0	1	1	0
298	UM	residual glioblastoma	glioblastoma	4	0	0	0	0	0
299	UM	Glioblastoma	glioblastoma	4	0	0	0	0	0
300	UM	glioblastoma	glioblastoma	4	0	0	0	0	0
301	UM	Glioblastoma with small cell and focal sarcomatous changes	glioblastoma	4	0	0	0	0	0
302	UM	ANAPLASTIC OLIGODENDROGLIOMA, IDH-MUTANT, WHO GRADE III	oligodendroglioma	3	1	0	1	1	0
303	UM	Glioblastoma, IDH1 R132H negative, WHO grade 4	glioblastoma	4	0	0	0	0	0
304	UM	Infiltrating glioma, IDH-mutant, at least WHO grade III	oligodendroglioma	3	1	0	1	1	0
305	UM	Infiltrating glioma, IDH-mutant, at least WHO grade III	oligodendroglioma	3	1	0	1	1	0
306	UM	Anaplastic Astrocytoma, IDH1 mutant, WHO grade 3	astrocytoma	3	1	0	1	0	1
307	UM	RESIDUAL/RECURRENT ASTROCYTOMA, IDH-MUTANT, WHO GRADE 2	astrocytoma	2	1	0	1	0	1
308	UM	Predominantly gliotic brain tissue Recurrent/residual glioblastoma, WHO grade IV, with sheet-like necrosis and vascular hyalinization, consistent with treatment effect	glioblastoma	4	0	0	0	0	0
309	UM	Anaplastic astrocytoma, IDH R132H mutant, WHO grade III	astrocytoma	3	1	0	1	0	1
310	UM	GLIOBLASTOMA, IDH-WILDTYPE, WHO GRADE 4	glioblastoma	4	0	0	0	0	0
311	UM	Oligodendroglioma, IDH-mutant and 1p/19q-codeleted, WHO grade II	oligodendroglioma	2	1	0	1	1	0
312	UM	ANAPLASTIC OLIGODENDROGLIOMA, IDH-MUTANT, WHO GRADE 3, RECURRENT /RESIDUAL	oligodendroglioma	3	1	0	1	1	0
313	UM	Recurrent/residual gliosarcoma, WHO grade IV.	glioblastoma	4	0	0	0	0	0
314	UM	Gliotic brain tissue with treatment effect and recurrent/residual glioblastoma, WHO grade IV	glioblastoma	4	0	0	0	0	0
315	UM	Anaplastic astrocytoma, IDH1 R132L mutant, WHO grade III	astrocytoma	3	1	0	1	0	1
316	UM	Oligodendroglioma, WHO grade 2, with high proliferation index	oligodendroglioma	2	1	0	1	1	0
317	UM	at least anaplastic astrocytoma, IDH1 mutated, WHO grade III	astrocytoma	3	1	0	1	0	1
318	UM	Recurrent/residual glioblastoma	glioblastoma	4	0	0	0	0	0
319	UM	Anaplastic oligodendroglioma, IDH-mutant and 1p/19q-codeleted, WHO grade 3.	oligodendroglioma	3	1	0	1	1	0
320	UM	GLIOBLASTOMA, IDH-wildtype, WHO grade IV	glioblastoma	4	0	0	0	0	0
321	UM	GLIOBLASTOMA, IDH-wildtype, WHO grade IV	glioblastoma	4	0	0	0	0	0
322	UM	Oligodendroglioma, WHO grade II	oligodendroglioma	2	1	0	1	1	0
323	UM	Oligodendroglioma, WHO grade II	oligodendroglioma	2	1	0	1	1	0
324	UM	Anaplastic astrocytoma	astrocytoma	3	0	0	0	0	0
325	UM	Anaplastic Astrocytoma, WHO grade III	astrocytoma	3	0	0	0	0	0
326	UM	Glioblastoma; IDH1/2-Wildtype; WHO Grade IV	glioblastoma	4	0	0	0	0	0
327	UM	anaplastic oligodendroglioma	oligodendroglioma	3	1	0	1	1	0
328	UM	anaplastic oligodendroglioma	oligodendroglioma	3	1	0	1	1	0
329	UM	Glioblastoma, IDH1 R132H-negative, WHO grade 4	glioblastoma	4	0	0	0	0	0
330	UM	Oligodendroglioma, IDH-mutant and 1p/19q-codeleted, WHO grade 2	oligodendroglioma	2	1	0	1	1	0
331	UM	RECURRENT/RESIDUAL GLIOBLASTOMA, WHO GRADE 4, WITH PROMINENT SARCOMATOUS DIFFERENTIATION	glioblastoma	4	0	0	0	0	0
332	UM	Infiltrative astrocytoma	astrocytoma	3	1	0	1	0	1
333	UM	Oligodendroglioma, IDH1 R132H mutant, WHO grade 2 with focal high proliferation index.	oligodendroglioma	2	1	0	1	1	0
334	UM	Anaplastic Astrocytoma	astrocytoma	3	1	0	1	0	1
335	UM	Anaplastic astrocytoma	astrocytoma	3	1	0	1	0	1
336	UM	Oligodendroglioma	oligodendroglioma	2	1	0	1	1	0
337	UM	oligodendroglioma	oligodendroglioma	2	1	0	1	1	0
338	UM	anaplastic astrocytoma	astrocytoma	3	1	0	1	0	1
339	UM	glioblastoma	glioblastoma	4	0	0	0	0	0
340	UM	Astrocytoma	astrocytoma	4	1	0	1	0	0
341	UM	brain parenchyma with atypical cells. recurrent/residual glioblastoma	glioblastoma	4	0	0	0	0	0
342	UM	residaul/recurrent glioma	glioblastoma	4	0	0	0	0	0
343	UM	glioblastoma	glioblastoma	4	0	0	0	0	0
344	UM	oligodendroglioma	oligodendroglioma	2	1	0	1	1	0
345	UM	Diffuse astrocytoma	astrocytoma	2	1	0	1	0	1
346	UM	Anaplastic oligodendroglioma, IDH-mutant, 1p/19q-codeleted, WHO grade III.	oligodendroglioma	3	1	0	1	1	0
347	UM	Gliosarcoma	glioblastoma	4	0	0	0	0	0
348	UM	Gliosarcoma	glioblastoma	4	0	0	0	0	0
349	UM	Recurrent/residual giant cell glioblastoma, WHO grade 4	glioblastoma	4	0	0	0	0	0
350	UM	Recurrent glioblastoma, WHO grade IV	glioblastoma	4	0	0	0	0	0
351	UM	Anaplastic oligodendroglioma, IDH-mutant and 1p/19q codeleted, WHO grade 3	oligodendroglioma	3	1	0	1	1	0
352	UM	Astrocytoma, IDH-mutant, WHO grade 2	astrocytoma	2	1	0	1	0	1
353	UM	Astrocytoma, IDH-mutant, at least WHO grade 2	astrocytoma	2	1	0	1	0	1
354	UM	Glioblastoma	glioblastoma	4	0	0	0	0	0
355	UM	Recurrent/residual giant cell glioblastoma, WHO grade 4	glioblastoma	4	0	0	0	0	0
356	UM	Recurrent/residual glioblastoma, WHO grade 4 with prominent necrosis about 40%	glioblastoma	4	0	0	0	0	0
357	UM	Infiltrating glioma, IDH1 R132H-negative, at least WHO grade III	astrocytoma	3	1	0	1	0	0
358	UM	Low-grade glioma	astrocytoma	2	1	0	1	0	1
359	UM	glioblastoma	glioblastoma	4	0	0	0	0	0
360	UM	ASTROCYTOMA, IDH-MUTANT, WHO GRADE 3	astrocytoma	3	1	0	1	0	1
361	UM	OLIGODENDROGLIOMA, IDH-MUTANT, 1p/19q CO-DELETED, WHO GRADE 2, WITH HIGH PROLIFERATION INDEX.	oligodendroglioma	2	1	0	1	1	0
362	UM	Glioblastoma, IDH-wildtype, WHO grade IV	glioblastoma	4	0	0	0	0	0
363	UM	Recurrent/residual glioblastoma, IDH1 R132H negative, WHO grade IV, with treatment effect.	glioblastoma	4	0	0	0	0	0
364	UM	Recurrent/residual glioblastoma, IDH1 R132H negative, WHO grade IV, with treatment effect.	glioblastoma	4	0	0	0	0	0
365	UM	Glioblastoma, IDH1 R132H negative, WHO grade IV	glioblastoma	4	0	0	0	0	0
366	UM	Glioblastoma, IDH1 R132H negative, WHO grade IV	glioblastoma	4	0	0	0	0	0
367	UM	Glioblastoma, IDH1 R132H negative, WHO grade IV	glioblastoma	4	0	0	0	0	0
368	UM	Glioblastoma	glioblastoma	4	0	0	0	0	0
369	UM	GLIOBLASTOMA, IDH1(R132H)-NEGATIVE, WHO GRADE 4	glioblastoma	4	0	0	0	0	0
370	UM	GLIOBLASTOMA, IDH1(R132H)-NEGATIVE, WHO GRADE 4	glioblastoma	4	0	0	0	0	0
371	UM	Recurrent/ Residual Glioblastoma, negative for IDH1 R132H (on previous resection), WHO grade	glioblastoma	4	0	0	0	0	0
372	UM	High-grade infiltrating astrocytoma, IDH-mutant, at least WHO grade III.	astrocytoma	3	1	0	1	0	1
373	UM	Astrocytoma, IDH-mutant, WHO grade 3	astrocytoma	3	1	0	1	0	1
