# Supplementary material for: AI-based molecular classification of diffuse gliomas using rapid, label-free optical imaging
Source: Research Square preprint supplement (doi:10.21203/rs.3.rs-1930236/v1), 2022-08-10
Supplement: Supplementary file 2 [file 77d5834b113c529dca15652e.xlsx]

## Sheet: multilabel_final
patient_id	center	idh_probs	idh_preds	idh_targs	codel_probs	codel_preds	codel_targs	atrx_probs	atrx_preds	atrx_targs	subgroup_pred	subgroup_targ
1	MUV	0.97755	1	1	0.449735	0	0	0.50069	1	1	3	3
2	MUV	0.141606	0	0	0.065673	0	0	0.0507466	0	0	1	1
3	MUV	0.362016	0	0	0.330623	0	0	0.00929537	0	0	1	1
4	MUV	0.0490738	0	0	0.030609	0	0	0.04724	0	0	1	1
5	MUV	0.219225	0	0	0.133172	0	0	0.0654169	0	0	1	1
6	MUV	0.130906	0	0	0.0634283	0	0	0.0430953	0	0	1	1
7	MUV	0.590158	1	0	0.421398	0	0	0.104839	0	0	2	1
8	MUV	0.0177072	0	0	0.0059034	0	0	0.0133708	0	0	1	1
9	MUV	0.235808	0	0	0.184505	0	0	0.0520324	0	0	1	1
10	MUV	0.886851	1	1	0.410938	0	1	0.439036	0	0	3	2
11	MUV	0.839254	1	1	0.169465	0	0	0.186134	0	0	3	3
12	MUV	0.363006	0	0	0.102871	0	0	0.111063	0	0	1	1
13	MUV	0.0300452	0	0	0.0163002	0	0	0.0172229	0	0	1	1
14	MUV	0.714936	1	1	0.0363958	0	0	0.386881	0	1	3	3
15	MUV	0.546198	1	0	0.353715	0	0	0.104744	0	0	2	1
16	MUV	0.262147	0	0	0.0225748	0	0	0.22054	0	0	1	1
17	MUV	0.733122	1	1	0.4973	0	0	0.147116	0	1	2	3
18	MUV	0.151277	0	0	0.0971183	0	0	0.0162298	0	0	1	1
19	NYU	0.0889107	0	0	0.0113948	0	0	0.0695818	0	0	1	1
20	NYU	0.620649	1	1	0.0941841	0	0	0.456755	0	1	3	3
21	NYU	0.0329596	0	0	0.0164725	0	0	0.0131621	0	0	1	1
22	NYU	0.285021	0	1	0.268692	0	0	0.0435967	0	0	1	3
23	NYU	0.158009	0	0	0.0317081	0	0	0.0905294	0	0	1	1
24	NYU	0.100957	0	0	0.0416421	0	0	0.021822	0	0	1	1
25	NYU	0.0430302	0	0	0.0199262	0	0	0.0274778	0	0	1	1
26	NYU	0.0385894	0	0	0.0146006	0	0	0.0156822	0	0	1	1
27	NYU	0.173019	0	0	0.114181	0	0	0.098101	0	0	1	1
28	NYU	0.986974	1	1	0.710138	1	1	0.301584	0	0	2	2
29	NYU	0.106142	0	0	0.0198468	0	0	0.0582094	0	0	1	1
30	NYU	0.10003	0	0	0.00228432	0	0	0.0642322	0	0	1	1
31	NYU	0.0453025	0	0	0.017267	0	0	0.116887	0	0	1	1
32	NYU	0.740389	1	1	0.322082	0	0	0.369297	0	0	3	3
33	NYU	0.191943	0	0	0.00754598	0	0	0.174933	0	0	1	1
34	NYU	0.174098	0	0	0.00356151	0	0	0.197895	0	0	1	1
35	NYU	0.0196656	0	0	0.00162126	0	0	0.016694	0	0	1	1
36	NYU	0.132176	0	0	0.0716792	0	0	0.106887	0	0	1	1
37	NYU	0.132192	0	0	0.0676066	0	0	0.0758894	0	0	1	1
38	NYU	0.109298	0	0	0.0192468	0	0	0.0802596	0	0	1	1
39	NYU	0.0179265	0	0	0.00267332	0	0	0.245991	0	0	1	1
40	NYU	0.0388481	0	0	0.00177299	0	0	0.058744	0	0	1	1
41	NYU	0.0269407	0	0	0.0101568	0	0	0.0112234	0	0	1	1
42	NYU	0.445241	0	0	0.179767	0	0	0.101079	0	0	1	1
43	NYU	0.139778	0	0	0.0184178	0	0	0.10189	0	0	1	1
44	NYU	0.090527	0	0	0.0138692	0	0	0.0650565	0	0	1	1
45	NYU	0.211997	0	0	0.117598	0	0	0.0461404	0	0	1	1
46	NYU	0.61931	1	1	0.472716	0	1	0.119539	0	0	2	2
47	NYU	0.18372	0	0	0.104355	0	0	0.0545808	0	0	1	1
48	NYU	0.0687316	0	0	0.00670201	0	0	0.204415	0	0	1	1
49	NYU	0.773782	1	0	0.504406	1	0	0.221889	0	0	2	1
50	NYU	0.992464	1	1	0.956842	1	1	0.039464	0	0	2	2
51	NYU	0.0336876	0	0	0.00331588	0	0	0.0296339	0	0	1	1
52	NYU	0.34484	0	0	0.0454163	0	0	0.247748	0	0	1	1
53	NYU	0.0308291	0	0	0.00230959	0	0	0.0320388	0	0	1	1
54	NYU	0.00596916	0	0	0.00361567	0	0	0.00348932	0	0	1	1
55	NYU	0.578327	1	1	0.0565335	0	0	0.467851	0	1	3	3
56	NYU	0.36322	0	0	0.302361	0	0	0.0347586	0	0	1	1
57	NYU	0.0773678	0	0	0.0280617	0	0	0.0353211	0	0	1	1
58	NYU	0.0748841	0	0	0.0347945	0	0	0.150353	0	1	1	1
59	NYU	0.327404	0	1	0.241091	0	1	0.119753	0	0	1	2
60	NYU	0.387885	0	0	0.117871	0	0	0.215504	0	0	1	1
61	NYU	0.041144	0	0	0.00702373	0	0	0.0308751	0	1	1	1
62	NYU	0.412999	0	0	0.215826	0	0	0.062831	0	0	1	1
63	NYU	0.277005	0	0	0.0265148	0	0	0.202749	0	0	1	1
64	NYU	0.0472251	0	0	0.0103982	0	0	0.114581	0	0	1	1
65	NYU	0.0541206	0	0	0.0085201	0	0	0.217374	0	0	1	1
66	NYU	0.0848102	0	0	0.00714704	0	0	0.0959891	0	0	1	1
67	NYU	0.0222416	0	0	0.00239281	0	0	0.0234037	0	0	1	1
68	NYU	0.0175437	0	0	0.0025379	0	0	0.0636253	0	0	1	1
69	NYU	0.0301495	0	0	0.0049005	0	0	0.0890256	0	1	1	1
70	NYU	0.0344425	0	0	0.0352165	0	0	0.00178929	0	0	1	1
71	NYU	0.969131	1	1	0.646231	1	1	0.314374	0	0	2	2
72	NYU	0.208149	0	0	0.0656707	0	0	0.100149	0	0	1	1
73	NYU	0.298573	0	0	0.0109666	0	0	0.277488	0	0	1	1
74	NYU	0.0981087	0	0	0.0311676	0	0	0.0350923	0	0	1	1
75	NYU	0.115063	0	0	0.00325998	0	0	0.133697	0	0	1	1
76	NYU	0.163218	0	0	0.0132341	0	0	0.159584	0	0	1	1
77	NYU	0.0155414	0	1	0.00409122	0	0	0.0398897	0	0	1	3
78	NYU	0.992386	1	1	0.446896	0	0	0.5578	1	1	3	3
79	NYU	0.245874	0	0	0.073603	0	0	0.185177	0	0	1	1
80	NYU	0.969669	1	1	0.447251	0	1	0.531371	1	0	3	2
81	NYU	0.0274385	0	0	0.00529766	0	0	0.0365971	0	0	1	1
82	NYU	0.948415	1	1	0.847438	1	0	0.076042	0	1	2	3
83	NYU	0.0898339	0	0	0.0202187	0	0	0.0487149	0	0	1	1
84	NYU	0.0632285	0	0	0.00628585	0	0	0.0587027	0	0	1	1
85	NYU	0.347936	0	0	0.176208	0	0	0.0905157	0	0	1	1
86	NYU	0.390449	0	0	0.18151	0	0	0.10797	0	0	1	1
87	NYU	0.986836	1	1	0.964424	1	1	0.0154049	0	0	2	2
88	NYU	0.102143	0	0	0.0164613	0	0	0.0886018	0	0	1	1
89	NYU	0.0106817	0	0	0.00522745	0	0	0.00153134	0	0	1	1
90	NYU	0.036312	0	0	0.0240524	0	0	0.0163698	0	0	1	1
91	NYU	0.735357	1	1	0.362661	0	0	0.308084	0	0	3	3
92	NYU	0.16099	0	0	0.00953532	0	0	0.0777094	0	0	1	1
93	NYU	0.152055	0	0	0.00321469	0	0	0.0999032	0	0	1	1
94	NYU	0.232963	0	0	0.0668568	0	0	0.112714	0	0	1	1
95	NYU	0.122717	0	0	0.0795147	0	0	0.0312633	0	0	1	1
96	NYU	0.0676631	0	0	0.0142315	0	0	0.251624	0	0	1	1
97	NYU	0.165358	0	0	0.029635	0	0	0.123385	0	0	1	1
98	NYU	0.199046	0	0	0.129066	0	0	0.0380083	0	0	1	1
99	NYU	0.259343	0	0	0.11204	0	0	0.120683	0	0	1	1
100	UCSF	0.861626	1	1	0.485408	0	0	0.343455	0	1	3	3
101	UCSF	0.152912	0	0	0.0770449	0	0	0.0440494	0	0	1	1
102	UCSF	0.139973	0	0	0.0150932	0	0	0.0527492	0	0	1	1
103	UCSF	0.0169625	0	0	0.00601692	0	0	0.0137716	0	0	1	1
104	UCSF	0.99265	1	1	0.949373	1	1	0.0425183	0	0	2	2
105	UCSF	0.57034	1	0	0.177823	0	0	0.378196	0	0	3	1
106	UCSF	0.039168	0	0	0.0295275	0	0	0.0684725	0	0	1	1
107	UCSF	0.224405	0	0	0.121384	0	0	0.0664254	0	0	1	1
108	UCSF	0.586542	1	1	0.55084	1	1	0.0294372	0	0	2	2
109	UCSF	0.886928	1	1	0.576127	1	1	0.273456	0	0	2	2
110	UCSF	0.207454	0	0	0.00402668	0	0	0.255871	0	0	1	1
111	UCSF	0.997684	1	1	0.959334	1	1	0.0406406	0	0	2	2
112	UCSF	0.886928	1	1	0.576127	1	1	0.273456	0	0	2	2
113	UCSF	0.674716	1	1	0.380991	0	1	0.209951	0	0	2	2
114	UCSF	0.62172	1	1	0.608716	1	1	0.00632925	0	0	2	2
115	UCSF	0.599494	1	1	0.214755	0	0	0.359874	0	1	3	3
116	UCSF	0.8741	1	1	0.700728	1	1	0.150994	0	0	2	2
117	UCSF	0.886928	1	1	0.576127	1	1	0.273456	0	0	2	2
118	UCSF	0.997121	1	1	0.75495	1	1	0.257248	0	0	2	2
119	UCSF	0.444217	0	0	0.224008	0	0	0.167936	0	0	1	1
120	UCSF	0.994828	1	1	0.206456	0	0	0.791427	1	1	3	3
121	UCSF	0.928443	1	1	0.283432	0	0	0.563933	1	1	3	3
122	UCSF	0.0222475	0	0	0.0107882	0	0	0.0024998	0	0	1	1
123	UCSF	0.0162353	0	0	0.00647058	0	0	0.00643682	0	0	1	1
124	UCSF	0.191049	0	0	0.00242738	0	0	0.199419	0	0	1	1
125	UCSF	0.521968	1	1	0.251905	0	1	0.22462	0	0	3	2
126	UCSF	0.0161019	0	0	0.00395684	0	0	0.00909256	0	0	1	1
127	UCSF	0.995741	1	1	0.949975	1	1	0.0452802	0	0	2	2
128	UCSF	0.322171	0	0	0.0489516	0	0	0.210072	0	0	1	1
129	UCSF	0.304753	0	0	0.0371714	0	0	0.214741	0	0	1	1
130	UCSF	0.0940307	0	0	0.0334839	0	0	0.0375982	0	0	1	1
131	UCSF	0.949378	1	0	0.0797304	0	0	0.873153	1	0	3	1
132	UCSF	0.207454	0	0	0.00402668	0	0	0.255871	0	0	1	1
133	UCSF	0.93081	1	1	0.694566	1	1	0.238499	0	0	2	2
134	UKK	0.994323	1	1	0.402271	0	0	0.598556	1	1	3	3
135	UKK	0.671074	1	1	0.465924	0	1	0.167641	0	0	2	2
136	UKK	0.321498	0	0	0.239581	0	0	0.021943	0	0	1	1
137	UKK	0.590812	1	1	0.0218711	0	0	0.504087	1	1	3	3
138	UKK	0.0980452	0	0	0.0688296	0	0	0.0134681	0	0	1	1
139	UKK	0.607716	1	1	0.115327	0	0	0.481692	0	1	3	3
140	UKK	0.950571	1	1	0.916219	1	1	0.0334145	0	0	2	2
141	UKK	0.099069	0	0	0.00866088	0	0	0.380043	0	1	1	1
142	UKK	0.309406	0	0	0.0621313	0	0	0.205496	0	0	1	1
143	UKK	0.0613897	0	0	0.0158469	0	0	0.0353935	0	0	1	1
144	UKK	0.191899	0	0	0.0201462	0	0	0.166532	0	0	1	1
145	UKK	0.123025	0	0	0.031992	0	0	0.0514614	0	0	1	1
146	UKK	0.107144	0	0	0.0382247	0	0	0.039627	0	0	1	1
147	UKK	0.026493	0	0	0.00902517	0	0	0.00820673	0	0	1	1
148	UKK	0.0204158	0	0	0.0103782	0	0	0.00869781	0	0	1	1
149	UKK	0.248876	0	0	0.194831	0	0	0.00713682	0	0	1	1
150	UKK	0.0111632	0	0	0.00195946	0	0	0.0051011	0	0	1	1
151	UKK	0.103426	0	0	0.0562745	0	0	0.0266412	0	0	1	1
152	UKK	0.542481	1	1	0.0785079	0	0	0.404433	0	0	3	3
153	UKK	0.0639003	0	0	0.00302894	0	0	0.0504417	0	0	1	1
